# Supplementary material for: Thermal Stability and Resistance to Biodegradation of Humic Acid Adsorbed on Clay Minerals
Source: Preprints.org preprint supplement (doi:10.20944/preprints202308.1813.v1), 2023-08-28
Supplement: Supplementary file 1 [file supplementary]

## Supplementary Materials

**Table S1.** Weight loss of HA and minerals before and after sorption of HA (average of 2 analytical replicates).

| Sample                         | Weight Loss Intervals and % of Total Weight Loss ( $\Sigma$ ) |            |            |             |      | $\Sigma$ , % |
|--------------------------------|---------------------------------------------------------------|------------|------------|-------------|------|--------------|
|                                | 40-105 °C                                                     | 105-415 °C | 415-690 °C | 690-1000 °C | -    |              |
| Kaolinite                      | 4.56                                                          | 4.27       | 88.08      | 3.08        | -    | 14.32        |
|                                | 73.13                                                         | 7.08       | 17.91      | 1.88        | -    |              |
| Bentonite                      | 56.64                                                         | 23.06      | 20.30      | 3.00        | -    | 11.28        |
|                                | 27.20                                                         | 10.17      | 21.21      | 35.07       | 6.36 |              |
| HA                             | 9.42                                                          | 15.91      | 74.04      | 2.49        | -    | 17.81        |
|                                | 11.00                                                         | 16.58      | 71.87      | 1.97        | -    |              |
| Kaolinite+HA                   | 7.30                                                          | 17.50      | 74.69      | 2.03        | -    | 17.38        |
|                                | 80.43                                                         | 6.97       | 12.59      | 20.31       | 1.79 |              |
| 1 <sup>st</sup> sorption cycle | 74.52                                                         | 5.54       | 19.94      | 22.76       | 1.68 | 22.10        |
|                                | 73.47                                                         | 4.85       | 21.68      | 24.80       | 1.58 |              |
| 2 <sup>nd</sup> sorption cycle | 42.55                                                         | 20.53      | 36.92      | 3.51        | -    | 10.74        |
|                                | 37.89                                                         | 24.74      | 37.37      | 3.23        | -    |              |
| 3 <sup>rd</sup> sorption cycle | 37.43                                                         | 23.53      | 39.04      | 2.78        | -    | 11.28        |
|                                |                                                               |            |            |             |      |              |

491

492

493

494

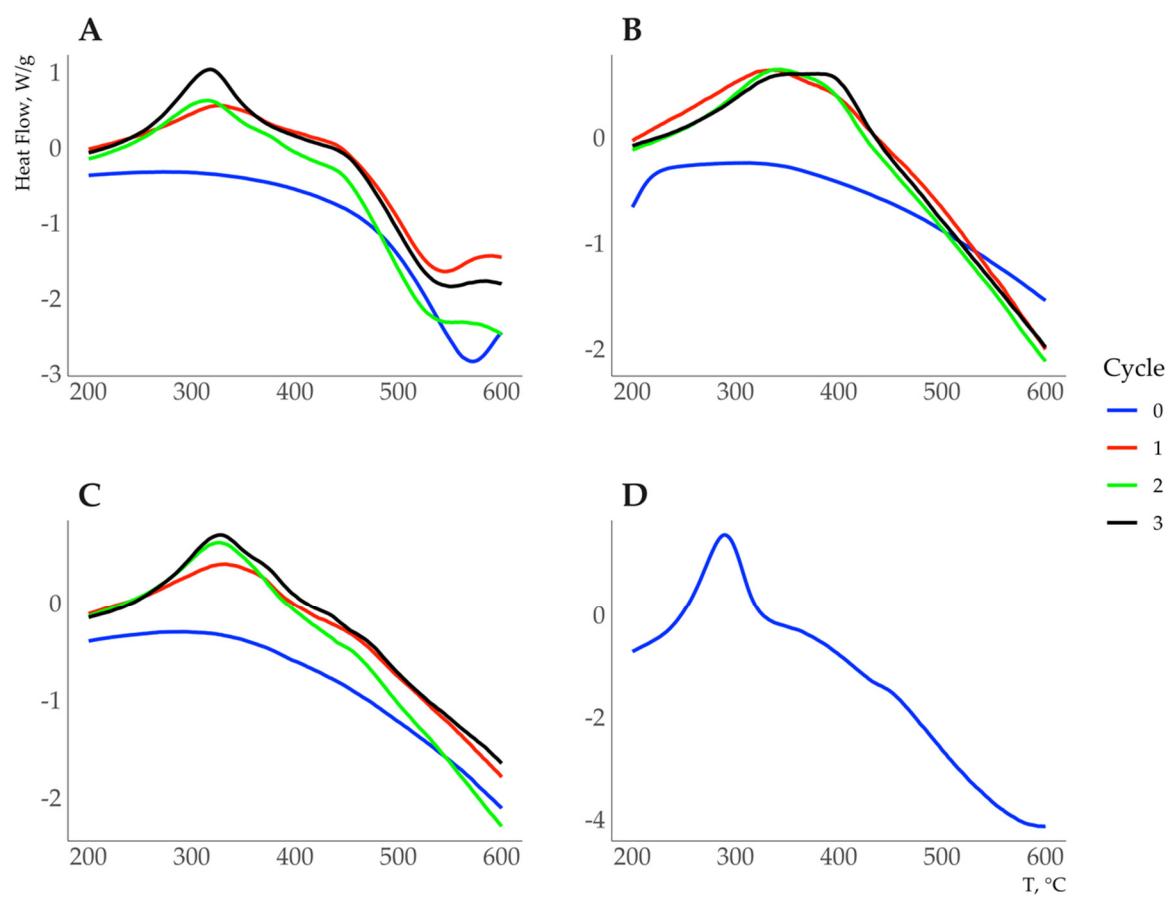

**Figure S2.** DSC curves for kaolinite (A), muscovite (B), bentonite (C), and HA (D), 200-600 °C region. The blue, red, green, and black colors indicate the DSC curves of the sorbents before HA sorption and after the 1<sup>st</sup>, 2<sup>nd</sup>, and 3<sup>rd</sup> sorption cycles, respectively.

495

496

497

498
